# Supplementary material for: Synthesis and Characterization of Te Nanotubes Decorated with Pt Nanoparticles for Fuel Cell Anode/Cathode Working at Neutral pH
Source: Preprints.org preprint supplement (doi:10.20944/preprints201903.0097.v1), 2019-03-07
Supplement: Supplementary file 1 [file supplementary]

**Synthesis and Characterization of Te Nanotubes Decorated with Pt Nanoparticles for fuel cell anode/cathode working at neutral pH.**

Maria Rachele Guascito1,*, Daniela Chirizzi2, Emanuela Filippo3, Francesco Milano4, Antonio Tepore3

1Dipartimento di Scienze e Tecnologie Biologiche e Ambientali, Università del Salento, S.P. Lecce-Monteroni, 73100 Lecce, Italy; maria.rachele.guascito@unisalento.it;

2IZS Puglia e Basilicata, U.O. Putignano. Via Chiancolla 1, C.da. S. Pietro Piturno, 70017 Putignano (BA), Italy;

3Dipartimento di Beni Culturali, Università del Salento, Lecce I-73100, Italy

4Istituto di Scienze delle produzioni Alimentari, Consiglio Nazionale delle Ricerche, S.P. Lecce-Monteroni, 73100 Lecce;

*Corresponding Author: maria.rachele.guascito@unisalento.it;

A

B

C

**Figure S1** Cyclic voltammetric curves as obtained on bare GC (red traces), bare Pt (blue traces) and **TeNT/PtNP/GC** (green traces) electrodes, in phosphate buffer pH 7.0, respectively at 100 mM (panel A), 500 mM (panel B) and 1000 mM (panel C) methanol solutions, after subtraction of signal obtained in the absence of methanol. Sweep rate 50 mV s−1.

B

A

**Figure S2** Cyclic voltammetric curves as obtained on bare GC (blue traces), bare Pt (red traces) and **TeNT/PtNP/GC** (green traces) electrodes in phosphate buffer a pH 7.0, at O2 atmosphericsolution (panel A) and O2 saturated solutions (panel B), after after subtraction of signal obtained in the absence of O2. Sweep rate 50 mV s−1.
